# Supplementary material for: Searching for Collective Behavior in a Large Network of Sensory Neurons
Source: PubMed Central journal article supplement (PMC3879139; doi:10.1371/journal.pcbi.1003408), 2014-01-02

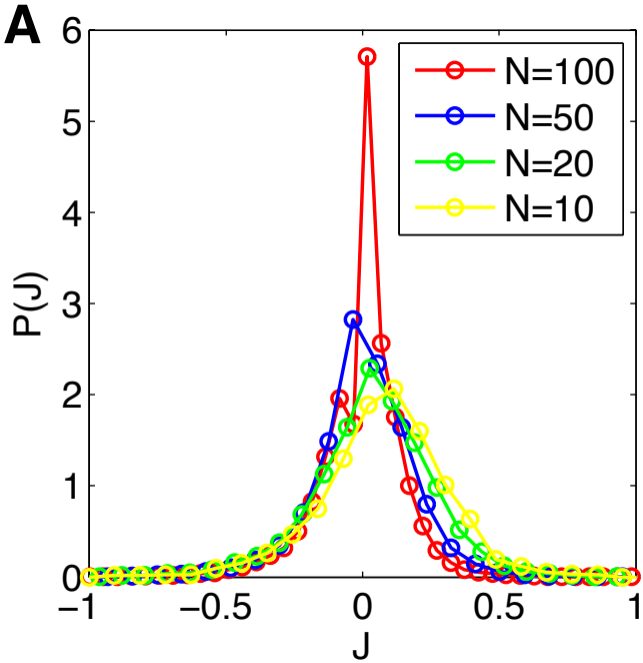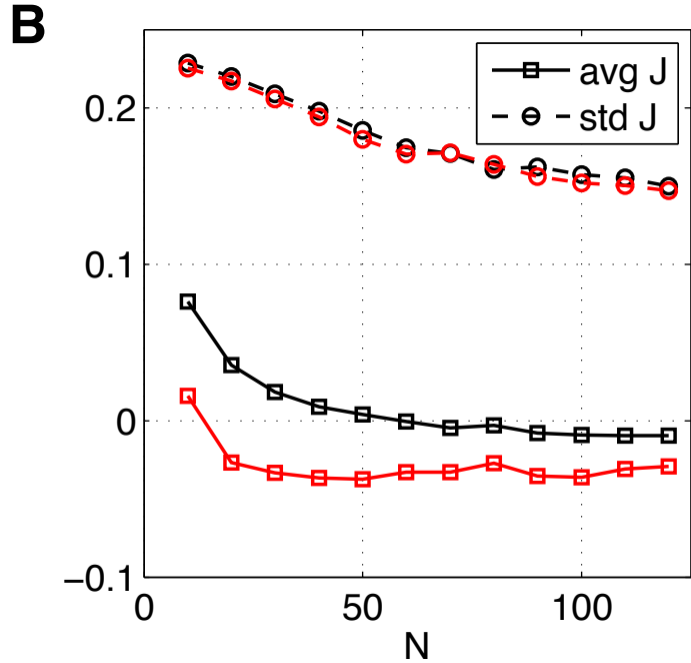

Supplement: pcbi.1003408.s001.pdf [file pcbi.1003408.s001.pdf]
